# Supplementary material
Source: PubMed Central journal article supplement (PMC3372914)
Supplement: NIHMS380219-supplement-Online_supplement.pdf [file NIHMS380219-supplement-Online_supplement.pdf]

## **SUPPLEMENTAL MATERIAL**

### **Results**

#### **Linear Correlation Revealed High Correlation Between Datasets**

To assess the quality of potential sources and degree of experimental variability, we calculated the correlation coefficients between datasets obtained after hybridization of the total RNA isolated from sorted BM subsets to Affymetrix HG-133A chips containing 22,283 probsets. All pairwise comparisons among 39 datasets (27 datasets from three diseased individuals D1-D3 and six control individuals C1-C6, and 12 repeated datasets from D2, C4, C5 and C6) revealed correlations with  $r=0.85-0.99$ . Correlations between datasets from repeated experiments from the same individuals were the highest ( $r=0.95-0.98$ ). Also the correlation between samples within the populations P, E, and M were the highest with  $r=0.92-0.99$  in the P and E populations, and  $r=0.95-0.99$  in the M population. The lowest correlations were found between datasets from patient and control samples. For further analysis the 27 unique datasets with the highest intra-group correlations from individuals D1-D3 and C1-C6 were chosen.

Supplemental Material

Table S1. All significantly changed genes in DBA samples

Significantly changed genes in multipotential progenitors (P population) in DBA samples

| Affymetrix ID | Symbol   | LocusLink | GO molecular function* | **GFChA-f.ch. | ***SAM -f.ch. |
|---------------|----------|-----------|------------------------|---------------|---------------|
| 209967_s_at   | CREM     | 1390      | transcription          | 7.48          | 6.16          |
| 203290_at     | HLA-DQA1 | 3117      |                        | 6.81          | -             |
| 209839_at     | KIAA0820 | 26052     |                        | 4.34          | 4.56          |
| 212589_at     | RRAS2    | 22800     | cancer                 | 3.98          | 3.46          |
| 213537_at     | HLA-DPA1 | 3113      |                        | 3.72          | 3.71          |
| 211833_s_at   | BAX      | 581       | apoptosis/cancer       | 3.49          | 3.32          |
| 214508_x_at   | CREM     | 1390      | transcription          | 3.48          | 3.22          |
| 202377_at     | LEPR     | 3953      | cancer                 | 3.22          | 3.07          |
| 205922_at     | VNN2     | 8875      |                        | 3.12          | -             |
| 202499_s_at   | SLC2A3   | 6515      |                        | 3.12          | -             |
| 218178_s_at   | GNAL     | 2774      |                        | 2.98          | -             |
| 205501_at     | -        | -         |                        | 2.93          | -             |
| 203882_at     | ISGF3G   | 10379     | transcription          | 2.84          | -             |
| 202858_at     | U2AF1    | 7307      |                        | 2.81          | -             |
| 202004_x_at   | SDHC     | 6391      |                        | 2.68          | 2.60          |
| 220243_at     | HSPC063  | 29068     |                        | 2.68          | -             |
| 204440_at     | CD83     | 9308      |                        | 2.62          | -             |
| 203146_s_at   | GABBR1   | 2550      |                        | 2.58          | 2.51          |
| 220221_at     | FLJ10619 | 55187     |                        | 2.55          | -             |
| 206118_at     | STAT4    | 6775      | transcription          | 2.53          | 2.40          |
| 210131_x_at   | SDHC     | 6391      |                        | 2.42          | 2.34          |
| 212051_at     | WIRE     | 147179    |                        | 2.41          | 2.35          |
| 206404_at     | FGF9     | 2254      |                        | 2.39          | -             |
| 208789_at     | PTRF     | 284119    |                        | 2.33          | -             |
| 213279_at     | DHRS1    | 115817    |                        | 2.27          | -             |
| 201089_at     | ATP6V1B2 | 526       |                        | 2.25          | 2.24          |
| 201484_at     | SUPT4H1  | 6827      | transcription          | 2.25          | -             |
| 200782_at     | ANXA5    | 308       |                        | 2.25          | -             |
| 212199_at     | MGC9651  | 114932    |                        | 2.23          | 2.19          |
| 218607_s_at   | FLJ10498 | 55153     |                        | 2.21          | 2.16          |
| 211582_x_at   | LST1     | 7940      |                        | 2.20          | -             |
| 212993_at     | MGC23427 | 138151    |                        | 2.19          | -             |
| 217739_s_at   | PBEF     | 10135     |                        | 2.18          | -             |
| 203528_at     | SEMA4D   | 10507     | apoptosis              | 2.12          | -             |
| 203265_s_at   | MAP2K4   | 6416      | apoptosis              | 2.11          | 2.06          |
| 203885_at     | RAB21    | 23011     | cancer                 | 2.11          | -             |
| 36711_at      | MAFF     | 23764     | transcription/cancer   | 2.10          | -             |
| 202322_s_at   | GGPS1    | 9453      |                        | 2.08          | 2.06          |
| 217897_at     | FXYD6    | 53826     |                        | 2.05          | -             |
| 211528_x_at   | HLA-G    | 3135      |                        | 2.04          | -             |
| 214211_at     | FTH1     | 2495      |                        | 2.02          | 2.04          |
| 201326_at     | CCT6A    | 908       |                        | -2.02         | -             |
| 201177_s_at   | UBA2     | 10054     |                        | -2.03         | -2.02         |
| 205361_s_at   | PFDN4    | 5203      |                        | -2.04         | -             |
| 201657_at     | ARL1     | 400       |                        | -2.04         | -             |
| 203675_at     | NUCB2    | 4925      |                        | -2.05         | -2.06         |
| 204528_s_at   | NAP1L1   | 4673      |                        | -2.05         | -2.03         |
| 202715_at     | CAD      | 790       |                        | -2.05         | -             |
| 210970_s_at   | IBTK     | 25998     |                        | -2.05         | -2.042        |
| 202469_s_at   | CPSF6    | 11052     |                        | -2.06         | -             |

## Supplemental Material

**Table S1. All significantly changed genes in DBA samples**

|             |                     |        |                                |       |        |
|-------------|---------------------|--------|--------------------------------|-------|--------|
| 200821_at   | <i>LAMP2</i>        | 3920   |                                | -2.06 | -2.066 |
| 209748_at   | <i>SPG4</i>         | 6683   |                                | -2.09 | -2.066 |
| 209513_s_at | <i>MGC10940</i>     | 84263  |                                | -2.10 | -      |
| 212927_at   | <i>SMC5L1</i>       | 23137  |                                | -2.11 | -      |
| 219174_at   | <i>CCDC2</i>        | 80173  |                                | -2.12 | -      |
| 203581_at   | <i>RAB4A</i>        | 5867   | cancer                         | -2.12 | -2.118 |
| 221553_at   | <i>DKFZp564K142</i> | 84061  |                                | -2.12 | -      |
| 202823_at   | <i>TCEB1</i>        | 6921   | transcription                  | -2.16 | -      |
| 207541_s_at | <i>PMSCL2</i>       | 5394   |                                | -2.16 | -      |
| 208753_s_at | <i>NAP1L1</i>       | 4673   |                                | -2.16 | -2.130 |
| 205347_s_at | <i>TMSNB</i>        | 11013  |                                | -2.20 | -      |
| 213549_at   | <i>SLC18A2</i>      | 6571   |                                | -2.21 | -      |
| 211747_s_at | <i>LSM5</i>         | 23658  |                                | -2.22 | -      |
| 211464_x_at | <i>CASP6</i>        | 839    | apoptosis                      | -2.22 | -      |
| 64432_at    | <i>CDV-1</i>        | 28981  | apoptosis                      | -2.23 | -      |
| 201397_at   | <i>PHGDH</i>        | 26227  |                                | -2.24 | -      |
| 208694_at   | <i>PRKDC</i>        | 5591   |                                | -2.24 | -      |
| 218128_at   | <i>NFYB</i>         | 4801   | transcription                  | -2.25 | -2.246 |
| 222297_x_at | <i>RPL18</i>        | 6141   |                                | -2.27 | -      |
| 203132_at   | <i>RB1</i>          | 5925   | transcription/cancer           | -2.30 | -      |
| 204453_at   | <i>ZNF84</i>        | 7637   |                                | -2.32 | -2.379 |
| 201163_s_at | <i>IGFBP7</i>       | 3490   |                                | -2.33 | -2.350 |
| 206674_at   | <i>FLT3</i>         | 2322   |                                | -2.37 | -      |
| 218256_s_at | <i>NUP54</i>        | 53371  |                                | -2.38 | -      |
| 202345_s_at | <i>FABP5</i>        | 2171   |                                | -2.38 | -2.391 |
| 200875_s_at | <i>NOL5A</i>        | 10528  |                                | -2.38 | -      |
| 212449_s_at | <i>LYPLA1</i>       | 10434  |                                | -2.41 | -2.388 |
| 202163_s_at | <i>CNOT8</i>        | 9337   | transcription                  | -2.42 | -      |
| 219762_s_at | <i>RPL36</i>        | 25873  |                                | -2.46 | -      |
| 201284_s_at | <i>APEH</i>         | 327    |                                | -2.46 | -      |
| 213129_s_at | -                   | 2653   |                                | -2.46 | -      |
| 202660_at   | -                   | 3709   |                                | -2.49 | -      |
| 212709_at   | <i>NUP160</i>       | 23279  |                                | -2.50 | -2.41  |
| 203049_s_at | <i>KIAA0372</i>     | 9652   |                                | -2.53 | -2.56  |
| 218334_at   | <i>NIF3L1BP1</i>    | 80145  |                                | -2.55 | -      |
| 208368_s_at | <i>BRCA2</i>        | 675    | apoptosis/transcription/cancer | -2.59 | -      |
| 207002_s_at | <i>PLAGL1</i>       | 5325   | apoptosis/cancer               | -2.61 | -      |
| 213786_at   | <i>TAX1BP1</i>      | 8887   |                                | -2.77 | -2.83  |
| 214043_at   | <i>PTPRD</i>        | 5789   |                                | -2.81 | -      |
| 218609_s_at | <i>NUDT2</i>        | 318    |                                | -2.85 | -      |
| 214678_x_at | <i>ZFX</i>          | 7543   |                                | -2.86 | -      |
| 203440_at   | <i>CDH2</i>         | 1000   |                                | -2.95 | -      |
| 218637_at   | <i>IMPACT</i>       | 55364  |                                | -3.02 | -3.05  |
| 204120_s_at | <i>ADK</i>          | 132    |                                | -3.05 | -      |
| 208794_s_at | <i>SMARCA4</i>      | 6597   | transcription                  | -3.23 | -      |
| 221797_at   | <i>LOC339229</i>    | 339229 |                                | -3.30 | -      |
| 221894_at   | <i>ADCK2</i>        | 90956  |                                | -3.42 | -3.27  |
| 213896_x_at | <i>KIAA0974</i>     | 317662 |                                | -3.44 | -      |
| 205402_x_at | <i>PRSS2</i>        | 5645   |                                | -3.94 | -      |
| 220085_at   | <i>HELLS</i>        | 3070   |                                | -4.11 | -      |
| 218480_at   | <i>FLJ21839</i>     | 60509  |                                | -4.25 | -      |
| 209739_s_at | <i>DXS1283E</i>     | 8228   |                                | -5.54 | -      |

**Supplemental Material**

**Table S1. All significantly changed genes in DBA samples**

|             |                      |       |       |       |
|-------------|----------------------|-------|-------|-------|
| 217716_s_at | <i>SEC61A1</i>       | 29927 | -5.92 | -     |
| 205830_at   | <i>CLGN</i>          | 1047  | -     | -2.26 |
| 206922_at   | <i>VCY1B /// VCY</i> | 9084  | -     | 2.39  |
| 219076_s_at | <i>PXMP2</i>         | 5827  | -     | -2.53 |
| 219583_s_at | <i>SPATA7</i>        | 55812 | -     | -2.48 |
| 221799_at   | <i>CSG1cA-T</i>      | 54480 | -     | -3.07 |
| 55705_at    | <i>C19orf22</i>      | 91300 | -     | 2.00  |

**Significantly changed genes in erythroid progenitors (E population) in DBA samples**

| <b>Affymetrix ID</b> | <b>Symbol</b>    | <b>LocusLink</b> |                      | <b>*GFChA-f.ch</b> | <b>**SAM -f.ch.</b> |
|----------------------|------------------|------------------|----------------------|--------------------|---------------------|
| 209295_at            | <i>TNFRSF10B</i> | 8795             | apoptosis            | 10.11              | 6.24                |
| 209894_at            | <i>LEPR</i>      | 3953             | cancer               | 4.49               | 4.27                |
| 203409_at            | <i>DDB2</i>      | 1643             | DNA repair           | 3.73               | 3.56                |
| 221081_s_at          | <i>FLJ22457</i>  | 79961            |                      | 3.57               | 3.60                |
| 204780_s_at          | <i>TNFRSF6</i>   | 355              | apoptosis            | 3.03               | 2.97                |
| 218346_s_at          | <i>SESN1</i>     | 27244            |                      | 2.74               | 2.66                |
| 219361_s_at          | <i>FLJ12484</i>  | 64782            |                      | 2.69               | 2.59                |
| 218627_at            | <i>FLJ11259</i>  | 55332            |                      | 2.57               | 2.59                |
| 209716_at            | <i>CSF1</i>      | 1435             |                      | 2.55               | 2.43                |
| 220520_s_at          | <i>FLJ20130</i>  | 54830            |                      | 2.43               | 2.35                |
| 212780_at            | <i>SOS1</i>      | 6654             |                      | 2.40               | 2.28                |
| 212792_at            | <i>KIAA0877</i>  | 23333            |                      | 2.37               | 2.27                |
| 201089_at            | <i>ATP6V1B2</i>  | 526              |                      | 2.37               | 2.29                |
| 40273_at             | <i>SPHK2</i>     | 56848            | transcription        | 2.32               | 2.19                |
| 201462_at            | <i>KIAA0193</i>  | 9805             |                      | 2.26               | 2.22                |
| 202193_at            | <i>LIMK2</i>     | 3985             |                      | 2.25               | 2.12                |
| 203567_s_at          | <i>TRIM38</i>    | 10475            |                      | 2.24               | 2.04                |
| 201221_s_at          | <i>SNRP70</i>    | 6625             |                      | 2.22               | 2.20                |
| 219146_at            | <i>FLJ22729</i>  | 79736            |                      | 2.19               | 2.11                |
| 218715_at            | <i>HCA66</i>     | 55813            |                      | 2.19               | 2.11                |
| 204781_s_at          | <i>TNFRSF6</i>   | 355              | apoptosis            | 2.15               | 2.07                |
| 202395_at            | <i>NSF</i>       | 4905             |                      | 2.13               | 2.06                |
| 206348_s_at          | <i>PDK3</i>      | 5165             |                      | 2.07               | 2.05                |
| 200961_at            | <i>SPS2</i>      | 22928            |                      | 2.06               | 2.07                |
| 208765_s_at          | <i>HNRPR</i>     | 10236            |                      | 2.04               | -                   |
| 221957_at            | <i>PDK3</i>      | 5165             |                      | 2.03               | 2.05                |
| 204060_s_at          | <i>PRKX</i>      | 5613             |                      | 2.03               | -                   |
| 205136_s_at          | <i>NUFIP1</i>    | 26747            |                      | 2.00               | -                   |
| 217336_at            | <i>RPS10</i>     | -                |                      | -2.05              | -2.04               |
| 221079_s_at          | <i>METTL2</i>    | 55798            |                      | -2.05              | -                   |
| 200003_s_at          | <i>RPL28</i>     | 6158             |                      | -2.07              | -2.12               |
| 201627_s_at          | <i>INSIG1</i>    | 3638             |                      | -2.32              | -2.49               |
| 221192_x_at          | <i>ET</i>        | 79157            |                      | -2.44              | -2.49               |
| 209740_s_at          | <i>DXS1283E</i>  | 8228             |                      | -2.49              | -2.50               |
| 217269_s_at          | <i>PRSS7</i>     | 5651             |                      | -2.57              | -                   |
| 206231_at            | <i>KCNN1</i>     | 3780             |                      | -2.61              | -                   |
| 216175_at            | <i>POLD2</i>     | 5425             |                      | -2.66              | -                   |
| 201439_at            | <i>GBF1</i>      | 8729             |                      | -2.69              | -                   |
| 52651_at             | <i>COL8A2</i>    | 1296             |                      | -2.70              | -                   |
| 221402_at            | <i>OR1F1</i>     | 4992             |                      | -2.78              | -                   |
| 209152_s_at          | <i>TCF3</i>      | 6929             | transcription/cancer | -2.80              | -                   |
| 203305_at            | <i>F13A1</i>     | 2162             |                      | -2.88              | -2.94               |

Supplemental Material

Table S1. All significantly changed genes in DBA samples

|             |                     |        |                      |       |        |
|-------------|---------------------|--------|----------------------|-------|--------|
| 214558_at   | <i>GPR12</i>        | 2835   |                      | -2.90 | -      |
| 220671_at   | <i>CCRN4L</i>       | 25819  | transcription        | -2.92 | -      |
| 205884_at   | <i>ITGA4</i>        | 3676   |                      | -2.96 | -      |
| 211364_at   | <i>MTAP</i>         | 4507   |                      | -2.97 | -      |
| 203686_at   | <i>MPG</i>          | 4350   |                      | -2.97 | -      |
| 222279_at   | <i>HLA-F</i>        | 3134   |                      | -2.98 | -2.97  |
| 214398_s_at | <i>IKBKE</i>        | 9641   |                      | -2.99 | -      |
| 216092_s_at | <i>SLC7A8</i>       | 23428  |                      | -3.00 | -      |
| 215071_s_at | -                   | -      |                      | -3.00 | -3.33  |
| 64064_at    | <i>IAN4L1</i>       | 55340  |                      | -3.02 | -      |
| 210519_s_at | <i>NQO1</i>         | 1728   |                      | -3.08 | -      |
| 208830_s_at | <i>SUPT6H</i>       | 6830   | transcription        | -3.09 | -      |
| 206111_at   | <i>RNASE2</i>       | 6036   |                      | -3.13 | -3.31  |
| 213353_at   | <i>ABCA5</i>        | 23461  |                      | -3.17 | -      |
| 215167_at   | <i>CRSP2</i>        | 9282   | transcription        | -3.18 | -      |
| 203637_s_at | <i>MID1</i>         | 4281   | transcription        | -3.19 | -      |
| 210568_s_at | <i>RECQL</i>        | 5965   | DNA repair           | -3.21 | -      |
| 221553_at   | <i>DKFZp564K142</i> | 84061  |                      | -3.22 | -3.08  |
| 209594_x_at | <i>PSG9</i>         | 5678   |                      | -3.24 | -      |
| 211325_x_at | <i>na</i>           | 283345 |                      | -3.25 | -      |
| 204638_at   | <i>ACP5</i>         | 54     | DNA repair           | -3.26 | -      |
| 204526_s_at | <i>TBC1D8</i>       | 11138  |                      | -3.29 | -      |
| 214108_at   | <i>MAX</i>          | 4149   | transcription/cancer | -3.32 | -      |
| 212776_s_at | <i>KIAA0657</i>     | 23363  |                      | -3.39 | -      |
| 219968_at   | <i>SZF1</i>         | 51385  | transcription        | -3.40 | -      |
| 216580_at   | -                   | -      |                      | -3.41 | -      |
| 217473_x_at | <i>SLC11A1</i>      | 6556   |                      | -3.41 | -      |
| 59433_at    | -                   | -      |                      | -3.42 | -      |
| 203586_s_at | <i>ARF4L</i>        | 379    |                      | -3.43 | -      |
| 215528_at   | -                   | -      |                      | -3.45 | -      |
| 205815_at   | <i>PAP</i>          | 5068   |                      | -3.45 | -      |
| 204979_s_at | <i>SH3BGR</i>       | 6450   |                      | -3.46 | -      |
| 203742_s_at | <i>TDG</i>          | 6996   | DNA repair           | -3.48 | -      |
| 205586_x_at | <i>VGF</i>          | 7425   |                      | -3.52 | -      |
| 208237_x_at | <i>ADAM22</i>       | 53616  |                      | -3.53 | -      |
| 202445_s_at | <i>NOTCH2</i>       | 4853   |                      | -3.53 | -      |
| 213422_s_at | <i>MGC3047</i>      | 84308  |                      | -3.56 | -      |
| 59375_at    | <i>MYO15B</i>       | 80022  |                      | -3.58 | -      |
| 205881_at   | <i>ZNF74</i>        | 7625   |                      | -3.58 | -      |
| 205607_s_at | <i>PACE-1</i>       | 57147  |                      | -3.59 | -3.77  |
| 206772_at   | <i>PTHR2</i>        | 5746   |                      | -3.60 | -      |
| 205144_at   | <i>MYL5</i>         | 4636   |                      | -3.61 | -      |
| 207061_at   | <i>ERN1</i>         | 2081   |                      | -3.61 | -      |
| 206212_at   | <i>CPA2</i>         | 1358   |                      | -3.63 | -12.70 |
| 206695_x_at | <i>ZNF43</i>        | 7594   |                      | -3.65 | -      |
| 213996_at   | <i>YPEL1</i>        | 29799  |                      | -3.67 | -      |
| 204956_at   | <i>MTAP</i>         | 4507   |                      | -3.68 | -      |
| 220682_s_at | <i>KLHL5</i>        | 51088  |                      | -3.69 | -      |
| 564_at      | <i>GNA11</i>        | 2767   |                      | -3.74 | -      |
| 219149_x_at | <i>DBR1</i>         | 51163  |                      | -3.75 | -      |
| 207417_s_at | <i>ZNF177</i>       | 7730   |                      | -3.77 | -      |
| 37586_at    | <i>ZNF142</i>       | 7701   | transcription        | -3.78 | -      |

Supplemental Material

**Table S1. All significantly changed genes in DBA samples**

|             |                   |        |                  |       |        |
|-------------|-------------------|--------|------------------|-------|--------|
| 210944_s_at | <i>CAPN3</i>      | 825    |                  | -3.78 | -      |
| 204029_at   | <i>CELSR2</i>     | 1952   | cancer           | -3.79 | -      |
| 212427_at   | <i>KIAA0368</i>   | 23392  |                  | -3.79 | -      |
| 218553_s_at | <i>MGC2628</i>    | 79047  |                  | -3.80 | -      |
| 208390_s_at | <i>GLP1R</i>      | 2740   |                  | -3.81 | -      |
| 215372_x_at | <i>LOC151878</i>  | 151878 |                  | -3.85 | -      |
| 204024_at   | <i>C8orf1</i>     | 734    |                  | -3.85 | -      |
| 214313_s_at | <i>IF2</i>        | 9669   | translation      | -3.85 | -      |
| 212570_at   | <i>KIAA0830</i>   | 23052  |                  | -3.87 | -3.55  |
| 218174_s_at | <i>FLJ13263</i>   | 80195  |                  | -3.87 | -      |
| 206197_at   | <i>NME5</i>       | 8382   | apoptosis        | -3.89 | -      |
| 203533_s_at | <i>CUL5</i>       | 8065   | apoptosis/cancer | -3.90 | -      |
| 206593_s_at | <i>SURF5</i>      | 6837   |                  | -3.92 | -29.38 |
| 208250_s_at | <i>DMBT1</i>      | 1755   | cancer           | -3.94 | -      |
| 219129_s_at | <i>FLJ11526</i>   | 79685  |                  | -3.95 | -      |
| 220244_at   | <i>NAG-7</i>      | 29931  |                  | -3.97 | -      |
| 214955_at   | <i>TMPRSS6</i>    | 164656 |                  | -3.98 | -      |
| 208546_x_at | <i>HIST1H2BH</i>  | 8345   |                  | -3.98 | -      |
| 212651_at   | <i>RHOBTB1</i>    | 9886   |                  | -3.99 | -      |
| 202183_s_at | <i>KIF22</i>      | 3835   |                  | -4.01 | -8.21  |
| 220471_s_at | <i>FLJ21269</i>   | 80177  |                  | -4.03 | -      |
| 209725_at   | <i>DRIM</i>       | 27340  |                  | -4.06 | -5.66  |
| 221082_s_at | <i>NDRG3</i>      | 57446  |                  | -4.07 | -      |
| 204741_at   | <i>BICD1</i>      | 636    |                  | -4.08 | -      |
| 205002_at   | <i>DJ159A19.3</i> | 27245  |                  | -4.08 | -      |
| 216960_s_at | <i>ZNF133</i>     | 7692   | transcription    | -4.08 | -      |
| 201896_s_at | <i>CKS1B</i>      | 1163   |                  | -4.08 | -      |
| 220494_s_at | <i>C14orf117</i>  | 55516  |                  | -4.13 | -4.27  |
| 220953_s_at | <i>PIP3AP</i>     | 54545  |                  | -4.14 | -      |
| 218221_at   | <i>ARNT</i>       | 405    | transcription    | -4.15 | -      |
| 219154_at   | <i>na</i>         | 144404 |                  | -4.16 | -      |
| 213124_at   | <i>ZFP100</i>     | 25888  |                  | -4.18 | -14.52 |
| 218144_s_at | <i>FLJ22056</i>   | 64423  |                  | -4.19 | -4.18  |
| 218969_at   | <i>Magmas</i>     | 51025  |                  | -4.23 | -      |
| 214931_s_at | <i>SRPK2</i>      | 6733   |                  | -4.24 | -      |
| 206613_s_at | <i>TAF1A</i>      | 9015   | transcription    | -4.27 | -4.73  |
| 211815_s_at | <i>GGA3</i>       | 23163  |                  | -4.28 | -      |
| 212531_at   | <i>LCN2</i>       | 3934   | cancer           | -4.29 | -      |
| 221616_s_at | <i>TAF9L</i>      | 51616  | transcription    | -4.31 | -      |
| 221164_x_at | <i>CHST5</i>      | 23563  |                  | -4.33 | -      |
| 212860_at   | <i>ZDHHC18</i>    | 84243  |                  | -4.36 | -      |
| 217715_x_at | -                 | -      |                  | -4.36 | -38.99 |
| 219215_s_at | <i>SLC39A4</i>    | 55630  |                  | -4.37 | -3.82  |
| 217367_s_at | <i>TIX1</i>       | 23051  |                  | -4.38 | -      |
| 221419_s_at | -                 | -      |                  | -4.38 | -      |
| 212398_at   | <i>RDX</i>        | 5962   |                  | -4.38 | -      |
| 203210_s_at | <i>RFC5</i>       | 5985   | DNA repair       | -4.39 | -13.92 |
| 218621_at   | <i>HEMK</i>       | 51409  |                  | -4.41 | -      |
| 214918_at   | <i>HNRPM</i>      | 4670   |                  | -4.42 | -96.90 |
| 204109_s_at | <i>NFYA</i>       | 4800   | transcription    | -4.49 | -21.59 |
| 212611_at   | <i>KIAA0937</i>   | 23220  |                  | -4.57 | -      |
| 208384_s_at | <i>MID2</i>       | 11043  | transcription    | -4.58 | -6.08  |

Supplemental Material

**Table S1. All significantly changed genes in DBA samples**

|             |                      |        |                                |       |        |
|-------------|----------------------|--------|--------------------------------|-------|--------|
| 202809_s_at | <i>FLJ21919</i>      | 65123  |                                | -4.59 | -      |
| 210634_at   | <i>AB026190</i>      | 27252  |                                | -4.60 | -32.15 |
| 212916_at   | <i>KIAA1111</i>      | 23133  | transcription                  | -4.61 | -      |
| 213550_s_at | <i>NDUFA2</i>        | 4695   |                                | -4.65 | -      |
| 205194_at   | <i>PSPH</i>          | 5723   |                                | -4.68 | -      |
| 210160_at   | <i>PAFAH1B2</i>      | 5049   |                                | -4.68 | -      |
| 219583_s_at | <i>SPATA7</i>        | 55812  |                                | -4.74 | -      |
| 214766_s_at | <i>AHCTF1</i>        | 25909  | transcription                  | -4.74 | -      |
| 221621_at   | -                    | -      |                                | -4.75 | -      |
| 221031_s_at | <i>DKFZP434F0318</i> | 81575  |                                | -4.78 | -      |
| 212567_s_at | <i>MAP4</i>          | 4134   |                                | -4.79 | -8.05  |
| 206848_at   | <i>HOXA7</i>         | 3204   | transcription                  | -4.80 | -      |
| 214169_at   | <i>UNC84A</i>        | 23353  |                                | -4.80 | -      |
| 207283_at   | <i>SPTBN1</i>        | 6711   |                                | -4.80 | -      |
| 205879_x_at | <i>RET</i>           | 5979   | cancer                         | -4.81 | -      |
| 219423_x_at | <i>TNFRSF25</i>      | 8718   | apoptosis                      | -4.81 | -      |
| 215023_s_at | <i>PEX1</i>          | 5189   |                                | -4.81 | -      |
| 202009_at   | <i>PTK9L</i>         | 11344  |                                | -4.82 | -      |
| 336_at      | <i>TBXA2R</i>        | 6915   |                                | -4.82 | -      |
| 208368_s_at | <i>BRCA2</i>         | 675    | apoptosis/transcription/cancer | -4.85 | -      |
| 219048_at   | <i>PIGN</i>          | 23556  |                                | -4.85 | -26.41 |
| 208527_x_at | <i>HIST1H2BE</i>     | 8344   |                                | -4.86 | -      |
| 218441_s_at | <i>DKFZP727M111</i>  | 26015  |                                | -4.87 | -      |
| 213561_at   | <i>ASF1A</i>         | 25842  |                                | -4.92 | -5.24  |
| 212484_at   | <i>SSSCA1</i>        | 10534  |                                | -4.93 | -      |
| 214116_at   | <i>BTD</i>           | 686    |                                | -4.94 | -      |
| 222045_s_at | <i>C20orf67</i>      | 63935  |                                | -4.94 | -      |
| 201602_s_at | <i>PPP1R12A</i>      | 4659   |                                | -4.95 | -18.47 |
| 222065_s_at | <i>FLII</i>          | 2314   |                                | -4.95 | -6.67  |
| 211781_x_at | -                    | -      |                                | -4.98 | -      |
| 206878_at   | <i>DAO</i>           | 1610   |                                | -4.99 | -      |
| 213344_s_at | <i>H2AFX</i>         | 3014   |                                | -5.04 | -      |
| 205037_at   | <i>RABL4</i>         | 11020  | cancer                         | -5.09 | -      |
| 203576_at   | <i>BCAT2</i>         | 587    |                                | -5.10 | -      |
| 215492_x_at | <i>PTCRA</i>         | 171558 |                                | -5.12 | -      |
| 201838_s_at | <i>STAF65(gamma)</i> | 9913   |                                | -5.14 | -14.22 |
| 211454_x_at | -                    | -      |                                | -5.15 | -8.22  |
| 209057_x_at | <i>CDC5L</i>         | 988    |                                | -5.16 | -      |
| 220048_at   | <i>EDAR</i>          | 10913  | apoptosis                      | -5.17 | -      |
| 221311_x_at | <i>DJ122O8.2</i>     | 57226  |                                | -5.20 | -      |
| 209865_at   | <i>SLC35A3</i>       | 23443  |                                | -5.22 | -      |
| 207206_s_at | <i>ALOX12</i>        | 239    |                                | -5.23 | -      |
| 210276_s_at | <i>HRIHFB2122</i>    | 11078  |                                | -5.28 | -      |
| 200884_at   | <i>CKB</i>           | 1152   |                                | -5.31 | -      |
| 35846_at    | <i>THRA</i>          | 7067   | transcription/cancer           | -5.34 | -      |
| 221960_s_at | <i>RAB2</i>          | 5862   | cancer                         | -5.34 | -      |
| 218958_at   | <i>FLJ20850</i>      | 55049  |                                | -5.42 | -      |
| 221788_at   | <i>PGM3</i>          | 5238   |                                | -5.44 | -      |
| 215128_at   | -                    | -      |                                | -5.44 | -10.35 |
| 212495_at   | <i>KIAA0876</i>      | 23030  | transcription                  | -5.45 | -7.49  |
| 214469_at   | <i>HIST1H2AE</i>     | 3012   |                                | -5.49 | -      |
| 213087_s_at | <i>EEF1D</i>         | 1936   | translation                    | -5.52 | -      |

Supplemental Material

**Table S1. All significantly changed genes in DBA samples**

|             |                  |        |                      |       |         |
|-------------|------------------|--------|----------------------|-------|---------|
| 215190_at   | <i>GA17</i>      | 10480  |                      | -5.56 | -       |
| 217549_at   | <i>HEM1</i>      | 3071   |                      | -5.58 | -       |
| 204388_s_at | <i>MAOA</i>      | 4128   |                      | -5.60 | -       |
| 201105_at   | <i>LGALS1</i>    | 3956   | apoptosis            | -5.61 | -       |
| 210883_x_at | <i>EFNB3</i>     | 1949   |                      | -5.68 | -       |
| 202944_at   | <i>NAGA</i>      | 4668   |                      | -5.69 | -9.81   |
| 216205_s_at | <i>MFN2</i>      | 9927   |                      | -5.71 | -7.41   |
| 213492_at   | <i>COL2A1</i>    | 1280   |                      | -5.75 | -       |
| 222233_s_at | <i>DCLRE1C</i>   | 64421  |                      | -5.82 | -5.54   |
| 202912_at   | <i>ADM</i>       | 133    |                      | -5.82 | -7.32   |
| 212969_x_at | <i>MTA2</i>      | 256364 |                      | -5.85 | -12.80  |
| 213826_s_at | <i>H3F3A</i>     | 3020   |                      | -5.85 | -       |
| 203582_s_at | <i>RAB4A</i>     | 5867   | cancer               | -5.98 | -5.70   |
| 203174_s_at | <i>ARFRP1</i>    | 10139  |                      | -6.00 | -       |
| 206648_at   | <i>HSPC059</i>   | 51276  |                      | -6.05 | -       |
| 213297_at   | <i>NOLA2</i>     | 55651  |                      | -6.05 | -       |
| 41047_at    | <i>C9orf16</i>   | 79095  |                      | -6.10 | -       |
| 213879_at   | <i>SMT3H2</i>    | 6613   |                      | -6.17 | -       |
| 215152_at   | <i>MYB</i>       | 4602   | transcription/cancer | -6.20 | -       |
| 209438_at   | <i>PHKA2</i>     | 5256   |                      | -6.23 | -63.13  |
| 209394_at   | <i>ASMTL</i>     | 8623   |                      | -6.24 | -7.21   |
| 208490_x_at | <i>HIST1H2BF</i> | 8343   |                      | -6.24 | -       |
| 218388_at   | <i>PGLS</i>      | 25796  |                      | -6.26 | -       |
| 201204_s_at | <i>RRBP1</i>     | 6238   |                      | -6.32 | -       |
| 216667_at   | <i>RNASE2</i>    | 6036   |                      | -6.33 | -6.98   |
| 209972_s_at | <i>JTV1</i>      | 7965   | translation          | -6.35 | -       |
| 222164_at   | <i>FGFR1</i>     | 2260   |                      | -6.36 | -67.29  |
| 206877_at   | <i>MAD</i>       | 4084   | transcription        | -6.42 | -       |
| 207598_x_at | <i>XRCC2</i>     | 7516   | DNA repair           | -6.54 | -       |
| 212099_at   | <i>ARHB</i>      | 388    | cancer               | -6.54 | -       |
| 214252_s_at | <i>CLN5</i>      | 1203   |                      | -6.65 | -14.96  |
| 217559_at   | <i>RPL10L</i>    | 140801 |                      | -6.67 | -6.25   |
| 215011_at   | <i>CHC1</i>      | 1104   |                      | -6.67 | -       |
| 201026_at   | <i>IF2</i>       | 9669   | translation          | -6.68 | -       |
| 216823_at   | -                | -      |                      | -6.68 | -       |
| 219219_at   | <i>FLJ20512</i>  | 54958  |                      | -6.74 | -       |
| 202192_s_at | <i>GAS7</i>      | 8522   | transcription        | -6.78 | -16.76  |
| 203945_at   | <i>ARG2</i>      | 384    |                      | -6.80 | -337.84 |
| 217672_x_at | -                | 350381 |                      | -6.93 | -       |
| 212980_at   | <i>AHSA2</i>     | 130872 |                      | -6.97 | -6.16   |
| 209538_at   | <i>ZNF32</i>     | 7580   |                      | -7.02 | -       |
| 221155_x_at | <i>PRO1496</i>   | 55467  |                      | -7.11 | -       |
| 211406_at   | <i>HSPC039</i>   | 51124  |                      | -7.19 | -       |
| 205653_at   | <i>CTSG</i>      | 1511   |                      | -7.32 | -12.41  |
| 207949_s_at | <i>ICA1</i>      | 3382   |                      | -7.47 | -39.25  |
| 209383_at   | <i>MARS</i>      | 4141   | transcription        | -7.55 | -48.59  |
| 208579_x_at | <i>H2BFS</i>     | 54145  |                      | -7.76 | -       |
| 57588_at    | <i>SLC24A3</i>   | 57419  |                      | -8.03 | -28.77  |
| 202112_at   | <i>VWF</i>       | 7450   |                      | -8.21 | -       |
| 203096_s_at | <i>PDZGEF1</i>   | 9693   |                      | -8.34 | -       |
| 212952_at   | <i>CALR</i>      | 811    |                      | -8.45 | -       |
| 209369_at   | <i>ANXA3</i>     | 306    |                      | -8.60 | -       |



Supplemental Material

Table S1. All significantly changed genes in DBA samples

|             |                   |       |                         |        |         |
|-------------|-------------------|-------|-------------------------|--------|---------|
| 214316_x_at | <i>CALR</i>       | 811   |                         | -9.78  | -       |
| 210098_s_at | <i>RARG-1</i>     | 51406 |                         | -10.24 | -       |
| 209890_at   | <i>TM4SF9</i>     | 10098 |                         | -11.06 | -       |
| 209788_s_at | <i>ARTS-1</i>     | 51752 |                         | -12.80 | -       |
| 214146_s_at | <i>PPBP</i>       | 5473  |                         | -15.79 | -       |
| 210140_at   | <i>CST7</i>       | 8530  |                         | -22.43 | -64.81  |
| 200041_s_at | <i>BAT1</i>       | 7919  |                         | -      | 2.02    |
| 200072_s_at | <i>HNRPM</i>      | 4670  |                         | -      | 2.03    |
| 200692_s_at | <i>HSPA9B</i>     | 3313  |                         | -      | 2.12    |
| 200696_s_at | <i>GSN</i>        | 2934  |                         | -      | -2.53   |
| 200697_at   | <i>HK1</i>        | 3098  |                         | -      | 2.32    |
| 200728_at   | <i>ACTR2</i>      | 10097 |                         | -      | 2.03    |
| 200739_s_at | <i>SUMO3</i>      | 6612  |                         | -      | -2.06   |
| 200788_s_at | <i>PEA15</i>      | 8682  | apoptosis/cancer        | -      | -2.00   |
| 200806_s_at | <i>HSPD1</i>      | 3329  |                         | -      | 2.15    |
| 200855_at   | <i>NCOR1</i>      | 9611  |                         | -      | -2.47   |
| 200866_s_at | <i>PSAP</i>       | 5660  |                         | -      | 2.81    |
| 200920_s_at | <i>BTG1</i>       | 694   |                         | -      | -2.03   |
| 201228_s_at | <i>ARIH2</i>      | 10425 |                         | -      | -2.28   |
| 201330_at   | <i>RARS</i>       | 5917  |                         | -      | 2.03    |
| 201460_at   | <i>MAPKAPK2</i>   | 9261  |                         | -      | -3.04   |
| 201566_x_at | <i>ID2</i>        | 3398  |                         | -      | -2.88   |
| 201677_at   | <i>DC12</i>       | 56941 |                         | -      | -2.72   |
| 201688_s_at | <i>TPD52</i>      | 7163  | cancer                  | -      | -15.02  |
| 201794_s_at | <i>C1orf16</i>    | 9887  |                         | -      | 2.01    |
| 201848_s_at | <i>BNIP3</i>      | 664   | apoptosis               | -      | -3.53   |
| 201950_x_at | <i>CAPZB</i>      | 832   |                         | -      | -2.34   |
| 202049_s_at | <i>ZNF262</i>     | 9202  |                         | -      | -2.05   |
| 202240_at   | <i>PLK1</i>       | 5347  | cancer                  | -      | -2.83   |
| 202450_s_at | <i>CTSK</i>       | 1513  |                         | -      | -2.46   |
| 202459_s_at | <i>LPIN2</i>      | 9663  |                         | -      | 2.06    |
| 202466_at   | <i>POLS</i>       | 11044 | DNA repair              | -      | 2.02    |
| 202592_at   | <i>BLOC1S1</i>    | 2647  |                         | -      | -7.13   |
| 202743_at   | <i>PIK3R3</i>     | 8503  |                         | -      | -7.91   |
| 202784_s_at | <i>NNT</i>        | 23530 |                         | -      | -2.77   |
| 202795_x_at | <i>HRIHFB2122</i> | 11078 |                         | -      | -2.61   |
| 202820_at   | <i>AHR</i>        | 196   | apoptosis/transcription | -      | -4.20   |
| 202894_at   | <i>EPHB4</i>      | 2050  |                         | -      | 2.16    |
| 202972_s_at | <i>FAM13A1</i>    | 10144 |                         | -      | -12.98  |
| 203179_at   | <i>GALT</i>       | 2592  |                         | -      | -3.84   |
| 203187_at   | <i>DOCK1</i>      | 1793  | apoptosis               | -      | -3.68   |
| 203433_at   | <i>MTHFS</i>      | 10588 |                         | -      | -3.16   |
| 203489_at   | <i>SIVA</i>       | 10572 | apoptosis               | -      | -3.87   |
| 203521_s_at | <i>ZNF318</i>     | 24149 |                         | -      | 2.08    |
| 203634_s_at | <i>CPT1A</i>      | 1374  |                         | -      | -2.48   |
| 203748_x_at | <i>RBMS1</i>      | 5937  |                         | -      | 2.21    |
| 203912_s_at | <i>DNASE1L1</i>   | 1774  |                         | -      | -2.19   |
| 203948_s_at | <i>MPO</i>        | 4353  | apoptosis               | -      | -4.54   |
| 204002_s_at | <i>ICA1</i>       | 3382  |                         | -      | -189.04 |
| 204021_s_at | <i>PURA</i>       | 5813  | transcription           | -      | -2.04   |
| 204121_at   | <i>GADD45G</i>    | 10912 | apoptosis/DNA repair    | -      | -3.79   |
| 204160_s_at | <i>ENPP4</i>      | 22875 |                         | -      | 2.16    |

Supplemental Material

**Table S1. All significantly changed genes in DBA samples**

|             |                 |       |               |   |        |
|-------------|-----------------|-------|---------------|---|--------|
| 204174_at   | <i>ALOX5AP</i>  | 241   |               | - | -2.62  |
| 204203_at   | <i>CEBPG</i>    | 1054  | transcription | - | -5.99  |
| 204246_s_at | <i>DCTN3</i>    | 11258 |               | - | -2.39  |
| 204361_s_at | <i>SCAP2</i>    | 8935  |               | - | -4.81  |
| 204460_s_at | <i>RAD1</i>     | 5810  | DNA repair    | - | -2.12  |
| 204479_at   | <i>OSTF1</i>    | 26578 | cancer        | - | -7.83  |
| 204490_s_at | <i>CD44</i>     | 960   |               | - | -4.60  |
| 204578_at   | <i>KIAA0377</i> | 9677  |               | - | -59.99 |
| 204862_s_at | <i>NME3</i>     | 4832  | apoptosis     | - | -2.82  |
| 204871_at   | <i>MTERF</i>    | 7978  | transcription | - | -2.36  |
| 204906_at   | <i>RPS6KA2</i>  | 6196  |               | - | -49.24 |
| 204978_at   | <i>SFRS16</i>   | 11129 |               | - | -2.88  |
| 204994_at   | <i>MX2</i>      | 4600  |               | - | -11.64 |
| 205072_s_at | <i>XRCC4</i>    | 7518  | DNA repair    | - | -5.98  |
| 205308_at   | <i>CGI-62</i>   | 51101 |               | - | -6.85  |
| 205328_at   | <i>CLDN10</i>   | 9071  |               | - | -3.00  |
| 205347_s_at | <i>TMSNB</i>    | 11013 |               | - | -3.59  |
| 205390_s_at | <i>ANK1</i>     | 286   |               | - | 2.82   |
| 205396_at   | <i>SMAD3</i>    | 25856 | transcription | - | -2.93  |
| 205483_s_at | <i>G1P2</i>     | 9636  |               | - | -5.90  |
| 205518_s_at | <i>CMAH</i>     | 8418  |               | - | -2.72  |
| 205612_at   | <i>MMRN1</i>    | 22915 |               | - | -7.03  |
| 205639_at   | <i>AOAH</i>     | 313   |               | - | -4.12  |
| 205682_x_at | <i>APOM</i>     | 55937 |               | - | -2.27  |
| 205687_at   | <i>UBPH</i>     | 56061 |               | - | -2.05  |
| 205726_at   | <i>DIAPH2</i>   | 1730  |               | - | -2.98  |
| 205750_at   | <i>BPHL</i>     | 670   |               | - | -2.99  |
| 205776_at   | <i>FMO5</i>     | 2330  |               | - | -3.68  |
| 205804_s_at | <i>T3JAM</i>    | 80342 |               | - | -11.07 |
| 205904_at   | <i>MICA</i>     | 4276  |               | - | -2.23  |
| 206023_at   | <i>NMU</i>      | 10874 |               | - | 2.63   |
| 206059_at   | <i>ZNF91</i>    | 7644  | transcription | - | -2.57  |
| 206431_x_at | <i>KIAA0676</i> | 23061 |               | - | -5.22  |
| 206660_at   | <i>IGLL1</i>    | 3543  |               | - | -3.21  |
| 206707_x_at | <i>C6orf32</i>  | 9750  |               | - | -2.98  |
| 206833_s_at | <i>ACYP2</i>    | 98    |               | - | -2.73  |
| 206845_s_at | <i>RNF40</i>    | 9810  |               | - | 2.30   |
| 206851_at   | <i>RNASE3</i>   | 6037  |               | - | -5.23  |
| 206871_at   | <i>ELA2</i>     | 1991  |               | - | -10.64 |
| 206951_at   | <i>HIST1H4E</i> | 8361  |               | - | -2.17  |
| 207136_at   | <i>ARR3</i>     | 407   |               | - | -16.46 |
| 207266_x_at | <i>RBMS1</i>    | 5937  |               | - | 2.12   |
| 207394_at   | <i>ZNF137</i>   | 7696  | transcription | - | -4.32  |
| 207496_at   | <i>MS4A2</i>    | 2206  |               | - | -4.06  |
| 207578_s_at | <i>HTR4</i>     | 3360  |               | - | -14.98 |
| 207605_x_at | <i>ZNF117</i>   | 51351 | transcription | - | -4.32  |
| 207608_x_at | <i>CYP1A2</i>   | 1544  |               | - | -4.12  |
| 207760_s_at | <i>NCOR2</i>    | 9612  |               | - | 2.08   |
| 207839_s_at | <i>C9orf127</i> | 51754 |               | - | -14.59 |
| 208119_s_at | <i>ZNF505</i>   | 81931 | transcription | - | -2.92  |
| 208365_s_at | <i>GRK4</i>     | 2868  |               | - | -4.50  |
| 208686_s_at | <i>BRD2</i>     | 6046  |               | - | -3.29  |

Supplemental Material

**Table S1. All significantly changed genes in DBA samples**

|             |                |        |                  |        |
|-------------|----------------|--------|------------------|--------|
| 208853_s_at | CANX           | 821    | -                | -2.39  |
| 208903_at   | RPS28          | 256949 | -                | -2.08  |
| 208935_s_at | LGALS8         | 3964   | cancer           | -2.72  |
| 209158_s_at | PSCD2          | 9266   | -                | -2.55  |
| 209217_s_at | WDR45          | 11152  | -                | -3.81  |
| 209310_s_at | CASP4          | 837    | apoptosis        | -2.06  |
| 209354_at   | TNFRSF14       | 8764   | -                | -2.92  |
| 209398_at   | HIST1H1C       | 3006   | -                | -17.11 |
| 209463_s_at | TAF12          | 6883   | transcription    | -2.08  |
| 209464_at   | AURKB          | 9212   | -                | -2.48  |
| 209508_x_at | CFLAR          | 8837   | apoptosis        | -3.77  |
| 209511_at   | POLR2F         | 5435   | transcription    | -2.10  |
| 209571_at   | CIR            | 9541   | transcription    | -2.61  |
| 209575_at   | IL10RB         | 3588   | -                | -2.28  |
| 209731_at   | NTHL1          | 4913   | DNA repair       | -4.89  |
| 209739_s_at | PNPLA4         | 8228   | -                | -2.10  |
| 209901_x_at | AIF1           | 199    | -                | -3.95  |
| 209938_at   | TADA2L         | 6871   | transcription    | -4.33  |
| 209943_at   | FBXL4          | 26235  | -                | -4.53  |
| 209975_at   | CYP2E1         | 1571   | -                | -3.49  |
| 210224_at   | MR1            | 3140   | -                | -3.12  |
| 210232_at   | CDC42          | 998    | -                | -2.73  |
| 210277_at   | AP4S1          | 11154  | -                | -2.39  |
| 210377_at   | SAH            | 6296   | -                | -2.53  |
| 210410_s_at | MSH5           | 4439   | DNA repair       | -10.16 |
| 210423_s_at | SLC11A1        | 6556   | -                | -3.55  |
| 210530_s_at | NR2C1          | 7181   | transcription    | -3.15  |
| 210639_s_at | APG5L          | 9474   | apoptosis        | -5.28  |
| 210733_at   | TRAM1          | 23471  | -                | -2.27  |
| 210758_at   | PSIP1          | 11168  | -                | -2.70  |
| 210829_s_at | SSBP2          | 23635  | -                | -2.46  |
| 210912_x_at | GSTM4          | 2948   | -                | -3.42  |
| 211144_x_at | TARP /// TRGV9 | 6965   | -                | -2.07  |
| 211168_s_at | RENT1          | 5976   | -                | 2.04   |
| 211200_s_at | MGC12458       | 84288  | -                | -3.47  |
| 211252_x_at | PTCRA          | 171558 | -                | -5.08  |
| 211260_at   | BMP7           | 655    | -                | -13.94 |
| 211328_x_at | HFE            | 3077   | -                | -16.73 |
| 211439_at   | SFRS7          | 6432   | -                | -4.48  |
| 211697_x_at | LOC56902       | 56902  | -                | -3.18  |
| 211743_s_at | PRG2           | 5553   | -                | -4.24  |
| 211833_s_at | BAX            | 581    | apoptosis/cancer | 2.71   |
| 211992_at   | PRKWNK1        | 65125  | -                | -3.15  |
| 212014_x_at | CD44           | 960    | -                | -3.12  |
| 212031_at   | RBM25          | 58517  | -                | 2.00   |
| 212044_s_at | ---            | 6157   | -                | -3.52  |
| 212054_x_at | KIAA0676       | 23061  | -                | -6.41  |
| 212178_s_at | POM121         | 9883   | -                | 2.79   |
| 212252_at   | CAMKK2         | 10645  | -                | -5.77  |
| 212254_s_at | DST            | 667    | -                | -5.28  |
| 212314_at   | KIAA0746       | 23231  | -                | 2.83   |
| 212319_at   | RUTBC1         | 9905   | -                | -9.90  |

Supplemental Material

Table S1. All significantly changed genes in DBA samples

|             |                  |        |                         |         |
|-------------|------------------|--------|-------------------------|---------|
| 212347_x_at | <i>MXD4</i>      | 10608  | -                       | -5.29   |
| 212374_at   | <i>FEM1B</i>     | 10116  | -                       | -2.18   |
| 212409_s_at | <i>LAP1B</i>     | 26092  | -                       | -2.33   |
| 212413_at   | <i>SEPT6</i>     | 23157  | -                       | -2.31   |
| 212423_at   | <i>C10orf56</i>  | 219654 | -                       | -2.42   |
| 212451_at   | <i>KIAA0256</i>  | 9728   | -                       | -24.27  |
| 212481_s_at | <i>TPM4</i>      | 7171   | -                       | -3.82   |
| 212528_at   | <i>D15Wsu75e</i> | -      | -                       | -22.64  |
| 212557_at   | <i>ZNF451</i>    | 26036  | -                       | 2.29    |
| 212649_at   | <i>TRAM1834</i>  | 54505  | -                       | -2.85   |
| 212717_at   | <i>PLEKHM1</i>   | 9842   | -                       | -3.54   |
| 212858_at   | <i>PAQR4</i>     | 9088   | -                       | -2.35   |
| 212911_at   | <i>KIAA0962</i>  | 23341  | -                       | -17.22  |
| 212991_at   | <i>FBXO9</i>     | 26268  | -                       | -2.50   |
| 213005_s_at | <i>ANKRD15</i>   | 23189  | -                       | 2.00    |
| 213076_at   | <i>ITPKC</i>     | 80271  | -                       | -5.72   |
| 213085_s_at | <i>KIBRA</i>     | 23286  | -                       | -13.11  |
| 213095_x_at | <i>AIF1</i>      | 199    | -                       | -2.26   |
| 213207_s_at | <i>GOSR2</i>     | 9570   | -                       | -3.32   |
| 213269_at   | <i>ZNF248</i>    | 57209  | -                       | -3.65   |
| 213275_x_at | <i>FDFT1</i>     | 1508   | -                       | -4.74   |
| 213281_at   | <i>JUN</i>       | 3725   | apoptosis/transcription | -2.55   |
| 213304_at   | <i>KIAA0423</i>  | 23116  | -                       | -3.59   |
| 213348_at   | <i>CDKN1C</i>    | 1028   | cancer                  | -2.71   |
| 213392_at   | <i>MGC35048</i>  | 124152 | -                       | -69.78  |
| 213431_x_at | <i>SFI1</i>      | 9814   | -                       | -10.82  |
| 213551_x_at | <i>RNF110</i>    | -      | transcription           | -32.14  |
| 213554_s_at | <i>H41</i>       | 55573  | -                       | -3.37   |
| 213786_at   | <i>TAX1BP1</i>   | 8887   | -                       | -4.07   |
| 213789_at   | <i>TRAM2959</i>  | 10682  | -                       | -3.50   |
| 213858_at   | <i>ZNF647</i>    | 58500  | -                       | -85.47  |
| 213875_x_at | <i>C6orf62</i>   | 81688  | -                       | -8.89   |
| 213897_s_at | <i>MRPL23</i>    | 6150   | -                       | -4.08   |
| 213907_at   | <i>EEF1E1</i>    | 9521   | translation             | -38.07  |
| 214036_at   | <i>TRAM3204</i>  | -      | -                       | -6.05   |
| 214052_x_at | <i>TRAM3220</i>  | 23215  | -                       | -4.78   |
| 214056_at   | <i>TRAM3224</i>  | 4170   | apoptosis               | -4.07   |
| 214057_at   | <i>TRAM3225</i>  | 4170   | apoptosis               | -2.25   |
| 214144_at   | <i>POLR2D</i>    | 5433   | transcription           | -8.44   |
| 214194_at   | <i>KIAA1008</i>  | 79866  | -                       | -5.27   |
| 214330_at   | <i>ATPAF2</i>    | 91647  | -                       | -4.28   |
| 214364_at   | <i>MGC61716</i>  | 130916 | -                       | -160.00 |
| 214369_s_at | <i>RASGRP2</i>   | 10235  | -                       | -4.43   |
| 214395_x_at | <i>EEF1D</i>     | 1936   | translation             | -22.97  |
| 214501_s_at | <i>H2AFY</i>     | 9555   | -                       | 2.04    |
| 214594_x_at | <i>ATP8B1</i>    | 5205   | -                       | -2.05   |
| 214714_at   | <i>ZNF394</i>    | 84124  | transcription           | -3.36   |
| 214780_s_at | <i>MYO9B</i>     | 4650   | -                       | -10.60  |
| 214910_s_at | <i>APOM</i>      | 55937  | -                       | -2.99   |
| 215022_x_at | <i>ZNF11B</i>    | 7558   | -                       | -3.76   |
| 215082_at   | <i>ELOVL5</i>    | 60481  | -                       | -4.11   |
| 215273_s_at | <i>TADA3L</i>    | 10474  | transcription           | -130.55 |

Supplemental Material

**Table S1. All significantly changed genes in DBA samples**

|             |                 |       |               |        |
|-------------|-----------------|-------|---------------|--------|
| 215450_at   | <i>TRAM4608</i> | 6635  | -             | -2.42  |
| 215471_s_at | <i>MAP7</i>     | 9053  | -             | -2.01  |
| 215476_at   | <i>TRAM4633</i> | -     | -             | -4.31  |
| 215532_x_at | <i>ZNF492</i>   | 57615 | -             | -3.38  |
| 215582_x_at | <i>TRAM4739</i> | 8888  | -             | -4.01  |
| 215711_s_at | <i>WEE1</i>     | 7465  | -             | -7.30  |
| 215785_s_at | <i>CYFIP2</i>   | 26999 | -             | 2.62   |
| 215832_x_at | <i>PICALM</i>   | 8301  | -             | -4.84  |
| 216008_s_at | <i>ARIH2</i>    | 10425 | -             | -32.06 |
| 216042_at   | <i>TNFRSF25</i> | 8718  | apoptosis     | -2.84  |
| 216354_at   | ---             | -     | -             | -2.17  |
| 216383_at   | <i>RPL18A</i>   | -     | -             | -3.14  |
| 216548_x_at | <i>HMG4L</i>    | -     | -             | -3.66  |
| 216570_x_at | ---             | -     | -             | -2.68  |
| 216620_s_at | <i>ARHGEF10</i> | 9639  | -             | -5.68  |
| 216713_at   | <i>CCM1</i>     | -     | -             | -2.41  |
| 217107_at   | ---             | -     | -             | -3.40  |
| 217346_at   | ---             | -     | -             | -2.00  |
| 217347_at   | ---             | -     | -             | -4.19  |
| 217501_at   | <i>CIAO1</i>    | 9391  | -             | -2.62  |
| 217529_at   | ---             | 54784 | -             | -3.51  |
| 217579_x_at | ---             | -     | -             | -2.43  |
| 217650_x_at | <i>ST3GAL2</i>  | 6483  | -             | -11.76 |
| 217693_x_at | ---             | -     | -             | -4.62  |
| 217878_s_at | <i>CDC27</i>    | 996   | -             | -21.32 |
| 218013_x_at | <i>DCTN4</i>    | 51164 | cancer        | -12.61 |
| 218018_at   | <i>PDXK</i>     | 8566  | -             | 2.45   |
| 218043_s_at | <i>AZI2</i>     | 64343 | -             | -3.56  |
| 218122_s_at | <i>SENP2</i>    | 59343 | -             | -6.84  |
| 218145_at   | <i>TRIB3</i>    | 57761 | apoptosis     | -8.06  |
| 218156_s_at | <i>FLJ10534</i> | 55720 | -             | 2.19   |
| 218291_at   | <i>MAPBPIP</i>  | 28956 | -             | -3.45  |
| 218402_s_at | <i>HPS4</i>     | 89781 | -             | 2.04   |
| 218414_s_at | <i>NDE1</i>     | 54820 | -             | -4.86  |
| 218531_at   | <i>FLJ21749</i> | 80194 | -             | -4.29  |
| 218607_s_at | <i>SDAD1</i>    | 55153 | -             | 2.16   |
| 218609_s_at | <i>NUDT2</i>    | 318   | -             | -5.30  |
| 218766_s_at | <i>WARS2</i>    | 10352 | -             | -3.05  |
| 218801_at   | <i>UGCGL2</i>   | 55757 | -             | -7.94  |
| 219001_s_at | <i>MGC10765</i> | 79269 | -             | -2.20  |
| 219090_at   | <i>SLC24A3</i>  | 57419 | -             | -2.72  |
| 219116_s_at | <i>C13orf17</i> | 55208 | -             | -2.17  |
| 219118_at   | <i>FKBP11</i>   | 51303 | -             | -2.19  |
| 219123_at   | <i>ZNF232</i>   | 7775  | transcription | -2.18  |
| 219138_at   | <i>RPL14</i>    | 9045  | -             | -13.80 |
| 219155_at   | <i>PITPNC1</i>  | 26207 | -             | -7.23  |
| 219204_s_at | <i>SRR</i>      | 63826 | -             | -4.45  |
| 219205_at   | <i>SRR</i>      | 63826 | -             | -2.51  |
| 219240_s_at | <i>C10orf88</i> | 80007 | -             | -2.89  |
| 219267_at   | <i>GLTP</i>     | 51228 | -             | -5.14  |
| 219289_at   | <i>FLJ20718</i> | 55027 | -             | -6.50  |
| 219291_at   | <i>MDS009</i>   | 56986 | -             | -2.52  |

Supplemental Material

Table S1. All significantly changed genes in DBA samples

|             |                  |        |                            |         |
|-------------|------------------|--------|----------------------------|---------|
| 219303_at   | <i>C13orf7</i>   | 79596  | -                          | 2.33    |
| 219506_at   | <i>FLJ23221</i>  | 79630  | -                          | -51.60  |
| 219507_at   | <i>MGC12197</i>  | 51319  | -                          | -4.47   |
| 219548_at   | <i>ZNF16</i>     | 7564   | -                          | -2.47   |
| 219563_at   | <i>C14orf139</i> | 79686  | -                          | 2.14    |
| 219661_at   | <i>RANBP17</i>   | 64901  | -                          | -3.97   |
| 219706_at   | <i>C20orf29</i>  | 55317  | -                          | -3.58   |
| 219708_at   | <i>NT5M</i>      | 56953  | -                          | -6.13   |
| 219961_s_at | <i>C20orf19</i>  | 55857  | -                          | -2.65   |
| 219992_at   | <i>TAC3</i>      | 6866   | -                          | -22.85  |
| 220036_s_at | <i>LIMR</i>      | 55716  | -                          | -6.10   |
| 220058_at   | <i>C17orf39</i>  | 79018  | -                          | -3.62   |
| 220157_x_at | <i>PLEKHA9</i>   | 51054  | -                          | -91.07  |
| 220183_s_at | <i>NUDT6</i>     | 11162  | -                          | -11.39  |
| 220202_s_at | <i>MNAB</i>      | 54542  | -                          | -2.25   |
| 220215_at   | <i>FLJ12606</i>  | 79862  | -                          | -2.30   |
| 220310_at   | <i>TUBAL3</i>    | 79861  | -                          | 4.71    |
| 220319_s_at | <i>MYLIP</i>     | 29116  | -                          | -2.40   |
| 220329_s_at | <i>C6orf96</i>   | 55005  | -                          | -5.74   |
| 220377_at   | <i>KIAA0125</i>  | 29064  | -                          | -2.73   |
| 220417_s_at | <i>THAP4</i>     | 51078  | -                          | -7.19   |
| 220496_at   | <i>CLEC2</i>     | 51266  | -                          | -4.21   |
| 220721_at   | <i>ZNF614</i>    | 80110  | -                          | -138.70 |
| 220951_s_at | <i>ACF</i>       | 29974  | -                          | -15.65  |
| 221188_s_at | <i>CIDEB</i>     | 27141  | -                          | -2.97   |
| 221216_s_at | <i>SCMH1</i>     | 22955  | apoptosis<br>transcription | -2.76   |
| 221421_s_at | <i>ADAMTS12</i>  | 81792  | -                          | -76.22  |
| 221435_x_at | <i>HT036</i>     | 81888  | -                          | -2.20   |
| 221579_s_at | <i>NUDT3</i>     | 11165  | -                          | -5.33   |
| 221587_s_at | <i>C19orf24</i>  | 55009  | -                          | -2.24   |
| 221634_at   | <i>RPL23AP7</i>  | 118433 | -                          | -4.20   |
| 221706_s_at | <i>MDS032</i>    | 55850  | -                          | -4.30   |
| 221740_x_at | ---              | 9884   | -                          | -9.93   |
| 221822_at   | <i>LOC112869</i> | 112869 | -                          | -4.28   |
| 221833_at   | <i>LONP</i>      | 6477   | apoptosis                  | -3.05   |
| 221877_at   | ---              | 126298 | -                          | 2.35    |
| 221897_at   | <i>TRIM52</i>    | 84851  | -                          | -3.98   |
| 221912_s_at | <i>MGC1203</i>   | 79140  | -                          | -7.73   |
| 221934_s_at | <i>FLJ10496</i>  | 55152  | -                          | -2.55   |
| 222062_at   | <i>IL27RA</i>    | 9466   | -                          | -11.63  |
| 222067_x_at | <i>HIST1H2BD</i> | 3017   | -                          | -5.13   |
| 222294_s_at | <i>EIF2C2</i>    | 5873   | -                          | -3.07   |
| 222297_x_at | <i>RPL18</i>     | 6141   | -                          | -2.10   |
| 222360_at   | <i>CGI-30</i>    | 51611  | -                          | -2.05   |
| 34689_at    | <i>TREX1</i>     | 11277  | DNA repair                 | -3.72   |
| 37943_at    | <i>ZFYVE26</i>   | 23503  | -                          | -2.47   |
| 38069_at    | <i>CLCN7</i>     | 1186   | -                          | -425.53 |
| 41856_at    | <i>UNC5B</i>     | 219699 | -                          | -3.25   |
| 43427_at    | <i>LOC283445</i> | 32     | -                          | -2.58   |
| 44669_at    | ---              | -      | -                          | -31.22  |
| 52005_at    | <i>WIZ</i>       | 58525  | -                          | -3.31   |
| 62212_at    | <i>MGC955</i>    | 79078  | -                          | -2.64   |

**Supplemental Material**

**Table S1. All significantly changed genes in DBA samples**

|          |                 |        |   |       |
|----------|-----------------|--------|---|-------|
| 64942_at | <i>GPR153</i>   | 387509 | - | -3.52 |
| 65521_at | <i>LOC51619</i> | -      | - | -3.94 |
| 78383_at | <i>TOPORS</i>   | -      | - | -2.11 |

**Significantly changed genes in myeloid progenitors (M population) in DBA samples**

| Affymetrix ID | Symbol              | LocusLink |                  | *GFChA-f.ch | **SAM -f.ch. |
|---------------|---------------------|-----------|------------------|-------------|--------------|
| 209959_at     | <i>NR4A3</i>        | 8013      | transcription    | 15.80       | -            |
| 203887_s_at   | <i>THBD</i>         | 7056      |                  | 13.71       | 13.06        |
| 203888_at     | <i>THBD</i>         | 7056      |                  | 7.81        | -            |
| 209967_s_at   | <i>CREM</i>         | 1390      | transcription    | 6.97        | -            |
| 209301_at     | <i>CA2</i>          | 760       |                  | 5.32        | 4.61         |
| 219628_at     | <i>WIG1</i>         | 64393     |                  | 4.75        | 5.23         |
| 203357_s_at   | <i>CAPN7</i>        | 23473     |                  | 3.62        | -            |
| 214735_at     | -                   | 26034     |                  | 3.61        | -            |
| 204735_at     | <i>PDE4A</i>        | 5141      |                  | 3.39        | -            |
| 218880_at     | <i>FOSL2</i>        | 2355      | transcription    | 3.37        | 2.91         |
| 209295_at     | <i>TNFRSF10B</i>    | 8795      | apoptosis        | 3.10        | 3.08         |
| 202955_s_at   | <i>BIG1</i>         | 10565     |                  | 3.09        | -            |
| 212902_at     | <i>SEC24A</i>       | 10802     |                  | 2.86        | -            |
| 209147_s_at   | <i>PPAP2A</i>       | 8611      | cancer           | 2.67        | -            |
| 203567_s_at   | <i>TRIM38</i>       | 10475     |                  | 2.57        | 2.58         |
| 203821_at     | <i>DTR</i>          | 1839      |                  | 2.55        | -            |
| 205076_s_at   | <i>CRA</i>          | 10903     |                  | 2.51        | -            |
| 212557_at     | <i>ZNF451</i>       | 26036     |                  | 2.48        | -            |
| 211833_s_at   | <i>BAX</i>          | 581       | apoptosis/cancer | 2.43        | -            |
| 212861_at     | <i>MGC11308</i>     | 84975     |                  | 2.34        | 2.31         |
| 219622_at     | <i>RAB20</i>        | 55647     | cancer           | 2.34        | -            |
| 202466_at     | <i>POLS</i>         | 11044     | DNA repair       | 2.29        | -            |
| 203553_s_at   | <i>MAP4K5</i>       | 11183     |                  | 2.28        | -            |
| 204160_s_at   | <i>ENPP4</i>        | 22875     |                  | 2.27        | 2.21         |
| 204072_s_at   | <i>13CDNA73</i>     | 10129     |                  | 2.22        | 2.22         |
| 222118_at     | <i>BM039</i>        | 55839     |                  | 2.22        | -            |
| 201776_s_at   | <i>KIAA0494</i>     | 9813      |                  | 2.19        | -            |
| 208863_s_at   | <i>SFRS1</i>        | 6426      | transcription    | 2.18        | -            |
| 207604_s_at   | <i>SLC4A7</i>       | 9497      |                  | 2.11        | -            |
| 209300_s_at   | <i>DKFZP566B183</i> | 25977     |                  | 2.10        | 2.10         |
| 203409_at     | <i>DDB2</i>         | 1643      | DNA repair       | 2.08        | 2.04         |
| 208630_at     | <i>HADHA</i>        | 3030      |                  | -2.01       | -            |
| 217266_at     | <i>RPL15</i>        | 6138      |                  | -2.04       | -            |
| 208970_s_at   | <i>UROD</i>         | 7389      |                  | -2.05       | -2.06        |
| 206059_at     | <i>ZNF91</i>        | 7644      | transcription    | -2.06       | -            |
| 214349_at     | -                   | -         |                  | -2.08       | -            |
| 200983_x_at   | <i>CD59</i>         | 966       |                  | -2.10       | -            |
| 218572_at     | <i>C14orf123</i>    | 29082     |                  | -2.13       | -            |
| 212781_at     | <i>RBBP6</i>        | 5930      |                  | -2.16       | -            |
| 204559_s_at   | <i>LSM7</i>         | 51690     |                  | -2.18       | -            |
| 214527_s_at   | <i>PQBP1</i>        | 10084     |                  | -2.20       | -            |
| 203582_s_at   | <i>RAB4A</i>        | 5867      | cancer           | -2.22       | -            |
| 211698_at     | <i>CRI1</i>         | 23741     |                  | -2.23       | -2.23        |
| 220494_s_at   | <i>C14orf117</i>    | 55516     |                  | -2.25       | -            |
| 212605_s_at   | -                   | 11165     |                  | -2.31       | -            |
| 220319_s_at   | <i>MIR</i>          | 29116     |                  | -2.31       | -            |

**Supplemental Material**

**Table S1. All significantly changed genes in DBA samples**

|             |                 |        |               |        |       |
|-------------|-----------------|--------|---------------|--------|-------|
| 208646_at   | <i>RPS14</i>    | 6208   |               | -2.32  | -2.31 |
| 202343_x_at | <i>COX5B</i>    | 1329   |               | -2.33  | -     |
| 201844_s_at | <i>RYBP</i>     | 23429  |               | -2.35  | -     |
| 203551_s_at | <i>COX11</i>    | 1353   |               | -2.36  | -2.33 |
| 221831_at   | <i>KIAA0601</i> | 23028  |               | -2.44  | -     |
| 209739_s_at | <i>DXS1283E</i> | 8228   |               | -2.45  | -     |
| 200003_s_at | <i>RPL28</i>    | 6158   |               | -2.45  | -2.41 |
| 200658_s_at | <i>PHB</i>      | 5245   | cancer        | -2.48  | -     |
| 213786_at   | <i>TAX1BP1</i>  | 8887   |               | -2.53  | -     |
| 211025_x_at | <i>COX5B</i>    | 1329   |               | -2.65  | -     |
| 204246_s_at | <i>DCTN3</i>    | 11258  |               | -2.65  | -     |
| 214321_at   | <i>NOV</i>      | 4856   |               | -2.68  | -     |
| 219762_s_at | <i>RPL36</i>    | 25873  |               | -2.82  | -2.79 |
| 220375_s_at | <i>H2AFY</i>    | 9555   |               | -2.88  | -     |
| 208851_s_at | <i>THY1</i>     | 7070   |               | -3.17  | -     |
| 213897_s_at | <i>MRPL23</i>   | 6150   |               | -3.74  | -     |
| 212884_x_at | <i>APOE</i>     | 348    |               | -5.46  | -     |
| 201228_s_at | <i>ARIH2</i>    | 10425  |               | -5.77  | -     |
| 217559_at   | <i>RPL10L</i>   | 140801 |               | -9.19  | -7.53 |
| 220646_s_at | <i>KLRF1</i>    | 51348  |               | -10.52 | -     |
| 202545_at   | <i>PRKCD</i>    | 5580   |               | -      | 3.72  |
| 211405_x_at | <i>IFNA17</i>   | 3451   |               | -      | -2.91 |
| 212271_at   | <i>MAPK1</i>    | 5594   | apoptosis     | -      | 2.02  |
| 212955_s_at | <i>POLR2I</i>   | 5438   | transcription | -      | -2.03 |
| 213385_at   | <i>CHN2</i>     | 1124   |               | -      | 2.98  |
| 219076_s_at | <i>PXMP2</i>    | 5827   |               | -      | -2.01 |
| 219678_x_at | <i>DCLRE1C</i>  | 64421  |               | -      | -2.06 |
| 220395_at   | <i>DNAJA4</i>   | 55466  |               | -      | 2.24  |

**GO molecular function\*** - Gene Ontology molecular function is only indicated if the gene is annotated to: apoptosis, transcription, translation, cancer and DNA repair categories

**\*\*GFChA - f.ch.** - Geometric Fold Change Analysis- fold change

**\*\*\*SAM - f.ch.**- Significance Analysis of Microarrays- fold change



Supplemental Material.

Table S2. Twenty-nine significantly changed genes in two or more cell types in DBA samples.

| Affymetrix ID | Symbol       | LocusLink | GO molecular function*         | Fold Changes |              |              |           |              |           |
|---------------|--------------|-----------|--------------------------------|--------------|--------------|--------------|-----------|--------------|-----------|
|               |              |           |                                | P population |              | E population |           | M population |           |
|               |              |           |                                | **G-f.ch.    | ***SAM-f.ch. | G-f.ch.      | SAM-f.ch. | G-f.ch.      | SAM-f.ch. |
| 211833_s_at   | BAX          | 581       | apoptosis/cancer               | 3.49         | 3.32         | -            | 2.71      | 2.43         | -         |
| 213786_at     | TAX1BP1      | 8887      |                                | -2.77        | -2.83        | -            | -4.07     | -2.53        | -         |
| 209739_s_at   | DXS1283E     | 8228      |                                | -5.54        | -            | -            | -2.10     | -2.45        | -2.41     |
| 201089_at     | ATP6V1B2     | 526       |                                | 2.25         | 2.24         | 2.37         | 2.29      | -            | -         |
| 218607_s_at   | FLJ10498     | 55153     |                                | 2.21         | 2.16         | -            | 2.16      | -            | -         |
| 221553_at     | DKFZp564K142 | 84061     |                                | -2.12        | -            | -3.22        | -3.08     | -            | -         |
| 205347_s_at   | TMSNB        | 11013     |                                | -2.20        | -            | -            | -3.59     | -            | -         |
| 222297_x_at   | RPL18        | 6141      |                                | -2.27        | -            | -            | -2.10     | -            | -         |
| 208368_s_at   | BRCA2        | 675       | apoptosis/transcription/cancer | -2.59        | -            | -4.85        | -         | -            | -         |
| 218609_s_at   | NUDT2        | 318       |                                | -2.85        | -            | -            | -         | -            | -         |
| 219583_s_at   | SPATA7       | 55812     |                                | -            | -2.48        | -            | -         | -            | -         |
| 209295_at     | TNFRSF10B    | 8795      | apoptosis                      | -            | -            | 10.11        | 6.24      | 3.10         | 3.08      |
| 203567_s_at   | TRIM38       | 10475     |                                | -            | -            | 2.24         | 2.04      | 2.57         | 2.58      |
| 212557_at     | ZNF451       | 26036     |                                | -            | -            | -            | 2.29      | 2.48         | -         |
| 202466_at     | POLS         | 11044     | DNA repair                     | -            | -            | -            | 2.02      | 2.29         | -         |
| 204160_s_at   | ENPP4        | 22875     |                                | -            | -            | 3.73         | 2.16      | 2.27         | 2.21      |
| 203409_at     | DDB2         | 1643      | DNA repair                     | -            | -            | -            | 3.56      | 2.08         | 2.04      |
| 206059_at     | ZNF91        | 7644      | transcription                  | -            | -            | -            | -2.57     | -2.06        | -         |
| 203582_s_at   | RAB4A        | 5867      | cancer                         | -            | -            | -5.98        | -5.70     | -2.22        | -         |
| 220494_s_at   | C14orf117    | 55516     |                                | -            | -            | -4.13        | -4.27     | -2.25        | -         |
| 220319_s_at   | MYLIP        | 29116     |                                | -            | -            | -            | -2.40     | -2.31        | -         |
| 200003_s_at   | RPL28        | 6158      |                                | -            | -            | -2.07        | -2.12     | -2.45        | -2.41     |
| 204246_s_at   | DCTN3        | 11258     |                                | -            | -            | -            | -2.39     | -2.65        | -         |
| 213897_s_at   | MRPL23       | 6150      |                                | -            | -            | -            | -4.08     | -3.74        | -         |
| 201228_s_at   | ARIH2        | 10425     |                                | -            | -            | -            | -2.28     | -5.77        | -         |
| 217559_at     | RPL10L       | 140801    | transcription                  | -            | -            | -6.67        | -6.25     | -9.19        | -7.53     |
| 209967_s_at   | CREM         | 1390      |                                | 7.48         | 6.16         | -            | -         | 6.97         | -         |
| 219762_s_at   | RPL36        | 25873     |                                | -2.46        | -            | -            | -         | -2.82        | -2.79     |
| 219076_s_at   | PXMP2        | 5827      |                                | -            | -2.53        | -            | -         | -            | -2.01     |

GO molecular function\* - Gene Ontology molecular function is only indicated if the gene is annotated to:

apoptosis, transcription, translation, cancer and DNA repair categories

\*\*G - f.ch. - Geometric Fold Change Analysis- fold change

\*\*\*SAM - f.ch.- Significance Analysis of Microarrays- fold change

**Table S3. Supplemental Material. Expression of MYB RNA related to GAPDH in three BM subsets in diseased and control samples.**

| BM cell population | Sample ID | MYB Average C <sub>T</sub> | GAPDH Average C <sub>T</sub> | $\Delta C_T$ MYB-GAPDH | $\Delta\Delta C_T$ ( $\Delta C_T - \Delta C_{T,C}$ ) | MYB Rel. to GAPDH ( $2^{-\Delta\Delta C_T}$ ) |
|--------------------|-----------|----------------------------|------------------------------|------------------------|------------------------------------------------------|-----------------------------------------------|
| P                  | (C1-C4)   | 26.56±0.25                 | 23.69±0.27                   | 2.87±0.37              | 0.00±0.37                                            | 1.00<br>(0.78-1.29)                           |
|                    | D1        | 29.84±0.27                 | 26.62±0.41                   | 3.22±0.49              | 0.35±0.61                                            | 0.78<br>(0.51-1.20)                           |
|                    | D2        | 27.53±0.02                 | 25.54±0.26                   | 1.99±0.26              | -0.88±0.45                                           | 1.84<br>(1.35-2.52)                           |
|                    | D3        | 23.26±0.12                 | 19.56±0.32                   | 3.70±0.34              | 0.83±0.50                                            | 0.56<br>(0.40-0.80)                           |
| E                  | (C1-C4)   | 25.57±0.50                 | 23.26±0.39                   | 2.31±0.63              | 0.00±0.63                                            | 1.00<br>(0.64-1.55)                           |
|                    | D1        | 29.09±0.07                 | 24.91±0.12                   | 4.18±0.14              | 1.88±0.65                                            | 0.27<br>(0.17-0.43)                           |
|                    | D2        | 33.32±0.04                 | 28.69±0.07                   | 4.63±0.08              | 2.32±0.64                                            | 0.20<br>(0.13-0.31)                           |
|                    | D3        | 22.89±0.12                 | 18.62±0.05                   | 4.27±0.51              | 1.97±0.81                                            | 0.26<br>(0.15-0.45)                           |
| M                  | (C1-C3)   | 25.60±0.25                 | 21.54±0.13                   | 4.06±0.28              | 0.00±0.28                                            | 1.00<br>(0.82-1.21)                           |
|                    | D2        | 26.15±0.10                 | 22.40±0.11                   | 3.76±0.15              | -0.30±0.32                                           | 1.23<br>(0.99-1.53)                           |
|                    | D3        | 27.62±0.22                 | 23.59±0.18                   | 4.04±0.29              | -0.02±0.40                                           | 1.01<br>(0.77-1.34)                           |

C – Control samples, D1 – diseased # 1, D2 – diseased # 2, D3 – diseased # 3, P – multipotential progenitors, E – erythroid progenitors, M – myeloid progenitors; C<sub>T</sub> - number of cycles; C<sub>T,C</sub> - number of control cycles

**Table S4. Supplemental Material. Expression of TNFRSF10B related to GAPDH in three BM subsets in diseased and control samples.**

| BM cell population | Sample ID | TNFRSF10B Average C <sub>T</sub> | GAPDH Average C <sub>T</sub> | ΔC <sub>T</sub> TNFRSF10B-GAPDH | ΔΔC <sub>T</sub> (ΔC <sub>T</sub> -ΔC <sub>T,C</sub> ) | TNFRSF10B Rel. to GAPDH (2 <sup>-ΔΔC<sub>T</sub></sup> ) |
|--------------------|-----------|----------------------------------|------------------------------|---------------------------------|--------------------------------------------------------|----------------------------------------------------------|
| P                  | (C1-C4)   | 35.40                            | 23.64                        | 11.76                           | 0.00                                                   | 1.00                                                     |
|                    | D1        | 38.04                            | 26.87                        | 11.17                           | -0.59                                                  | 1.41                                                     |
|                    | D2        | 34.76                            | 23.31                        | 11.45                           | -0.31                                                  | 1.69                                                     |
|                    | D3        | 32.11                            | 19.74                        | 12.37                           | 0.61                                                   | 0.65                                                     |
| E                  | (C1-C4)   | 34.21                            | 21.07                        | 13.13                           | 0.00                                                   | 1.00                                                     |
|                    | D1        | 34.58                            | 24.85                        | 9.73                            | -3.40                                                  | 10.55                                                    |
|                    | D3        | 29.98                            | 19.92                        | 10.06                           | -3.07                                                  | 8.39                                                     |
| M                  | (C1-C3)   | 33.16                            | 19.86                        | 13.30                           | 0.00                                                   | 1.00                                                     |
|                    | D2        | 33.88                            | 22.59                        | 11.29                           | -2.01                                                  | 4.02                                                     |
|                    | D3        | 35.62                            | 23.55                        | 12.07                           | -1.23                                                  | 2.34                                                     |

C – Control samples, D1 – diseased # 1, D2 – diseased # 2, D3 – diseased # 3, P – multipotential progenitors, E – erythroid progenitors, M – myeloid progenitors; C<sub>T</sub> - number of cycles; C<sub>T,C</sub> - number of control cycles

**Table S5. Supplemental Material. Expression of TNFRSF6 related to GAPDH in three BM subsets in diseased and control samples.**

| BM cell population | Sample ID | TNFRSF6<br>Average C <sub>T</sub> | GAPDH<br>Average C <sub>T</sub> | ΔC <sub>T</sub><br>TNFRSF6-<br>GAPDH | ΔΔC <sub>T</sub><br>(ΔC <sub>T</sub> -ΔC <sub>T,C</sub> ) | TNFRSF6<br>Rel. to GAPDH<br>(2 <sup>-ΔΔC<sub>T</sub></sup> ) |
|--------------------|-----------|-----------------------------------|---------------------------------|--------------------------------------|-----------------------------------------------------------|--------------------------------------------------------------|
| P                  | (C1-C4)   | 33.67                             | 21.95                           | 11.71                                | 0.00                                                      | 1.00                                                         |
|                    | D2        | 35.02                             | 23.48                           | 11.54                                | -0.17                                                     | 1.12                                                         |
|                    | D3        | 31.55                             | 20.01                           | 11.54                                | -0.17                                                     | 1.12                                                         |
| E                  | (C1-C4)   | 31.89                             | 20.91                           | 10.98                                | 0.00                                                      | 1.00                                                         |
|                    | D1        | 34.17                             | 24.77                           | 9.40                                 | -1.58                                                     | 2.98                                                         |
|                    | D2        | 37.79                             | 28.90                           | 8.89                                 | -2.09                                                     | 4.25                                                         |
|                    | D3        | 30.39                             | 21.15                           | 9.24                                 | -1.74                                                     | 3.34                                                         |
| M                  | (C1-C3)   | 32.88                             | 21.90                           | 10.98                                | 0.00                                                      | 1.00                                                         |
|                    | D2        | 33.10                             | 22.69                           | 10.41                                | -0.57                                                     | 1.48                                                         |
|                    | D3        | 33.44                             | 23.07                           | 10.37                                | -0.61                                                     | 1.52                                                         |

C – Control samples, D1 – diseased # 1, D2 – diseased # 2, D3 – diseased # 3, P – multipotential progenitors, E – erythroid progenitors, M – myeloid progenitors; C<sub>T</sub> - number of cycles; C<sub>T,C</sub> - number of control cycles

**Table S6. Supplemental Material. Expression of RPL18 RNA related to GAPDH in three BM subsets in diseased and control samples.**

| BM cell population | Sample ID | RPL18 Average C <sub>T</sub> | GAPDH Average C <sub>T</sub> | ΔC <sub>T</sub> RPL18-GAPDH | ΔΔC <sub>T</sub> (ΔC <sub>T</sub> -ΔC <sub>T,C</sub> ) | RPL18 Rel. to GAPDH (2 <sup>-ΔΔC<sub>T</sub></sup> ) |
|--------------------|-----------|------------------------------|------------------------------|-----------------------------|--------------------------------------------------------|------------------------------------------------------|
| P                  | (C1-C4)   | 27.39                        | 24.09                        | 3.30                        | 0.00                                                   | 1.00                                                 |
|                    | D1        | 29.09                        | 25.16                        | 3.93                        | 0.63                                                   | 0.65                                                 |
|                    | D2        | 27.94                        | 23.76                        | 4.18                        | 0.88                                                   | 0.54                                                 |
|                    | D3        | 23.85                        | 19.13                        | 4.72                        | 1.42                                                   | 0.37                                                 |
| E                  | (C1-C4)   | 26.96                        | 22.95                        | 4.02                        | 0.00                                                   | 1.00                                                 |
|                    | D1        | 27.41                        | 22.22                        | 5.19                        | 1.17                                                   | 0.44                                                 |
|                    | D2        | 33.13                        | 28.31                        | 4.82                        | 0.80                                                   | 0.57                                                 |
|                    | D3        | 24.21                        | 18.78                        | 5.43                        | 1.41                                                   | 0.38                                                 |
| M                  | (C1-C3)   | 26.15                        | 21.63                        | 4.52                        | 0.00                                                   | 1.00                                                 |
|                    | D2        | 26.12                        | 22.02                        | 4.10                        | -0.42                                                  | 0.75                                                 |
|                    | D3        | 30.25                        | 25.29                        | 4.96                        | 0.44                                                   | 1.35                                                 |

C – Control samples, D1 – diseased # 1, D2 – diseased # 2, D3 – diseased # 3, P – multipotential progenitors, E – erythroid progenitors, M – myeloid progenitors; C<sub>T</sub> - number of cycles; C<sub>T,C</sub> - number of control cycles

**Table S7. Supplemental Material. Expression of RPS19 RNA related to GAPDH in three BM subsets in diseased and control samples.**

| BM cell population | Sample ID | RPS19 Average C <sub>T</sub> | GAPDH Average C <sub>T</sub> | ΔC <sub>T</sub> RPS19-GAPDH | ΔΔC <sub>T</sub> (ΔC <sub>T</sub> -ΔC <sub>T,C</sub> ) | RPS19 Rel. to GAPDH (2 <sup>-ΔΔC<sub>T</sub></sup> ) |
|--------------------|-----------|------------------------------|------------------------------|-----------------------------|--------------------------------------------------------|------------------------------------------------------|
| P                  | (C1-C4)   | 20.92                        | 22.80                        | -1.88                       | 0.00                                                   | 1.00                                                 |
|                    | D2        | 19.40                        | 21.33                        | -1.93                       | -0.05                                                  | 1.03                                                 |
|                    | D3        | 19.29                        | 21.55                        | -2.26                       | -0.31                                                  | 1.23                                                 |
| E                  | (C1-C4)   | 18.55                        | 20.16                        | -1.61                       | 0.00                                                   | 1.00                                                 |
|                    | D2        | 17.46                        | 19.41                        | -1.95                       | 0.33                                                   | 1.25                                                 |
|                    | D3        | 19.22                        | 20.92                        | -1.70                       | 0.10                                                   | 1.07                                                 |
| M                  | (C1-C4)   | 18.66                        | 19.91                        | -1.33                       | 0.00                                                   | 1.00                                                 |
|                    | D2        | 18.71                        | 21.51                        | -2.80                       | -1.47                                                  | 2.77                                                 |
|                    | D3        | 20.11                        | 22.68                        | -2.57                       | -1.24                                                  | 2.36                                                 |

C – Control samples, D2 – diseased # 2, D3 – diseased # 3, P – multipotential progenitors, E – erythroid progenitors, M – myeloid progenitors; C<sub>T</sub> - number of cycles; C<sub>T,C</sub> - number of control cycles

Fig. S1 (Supplemental Material)

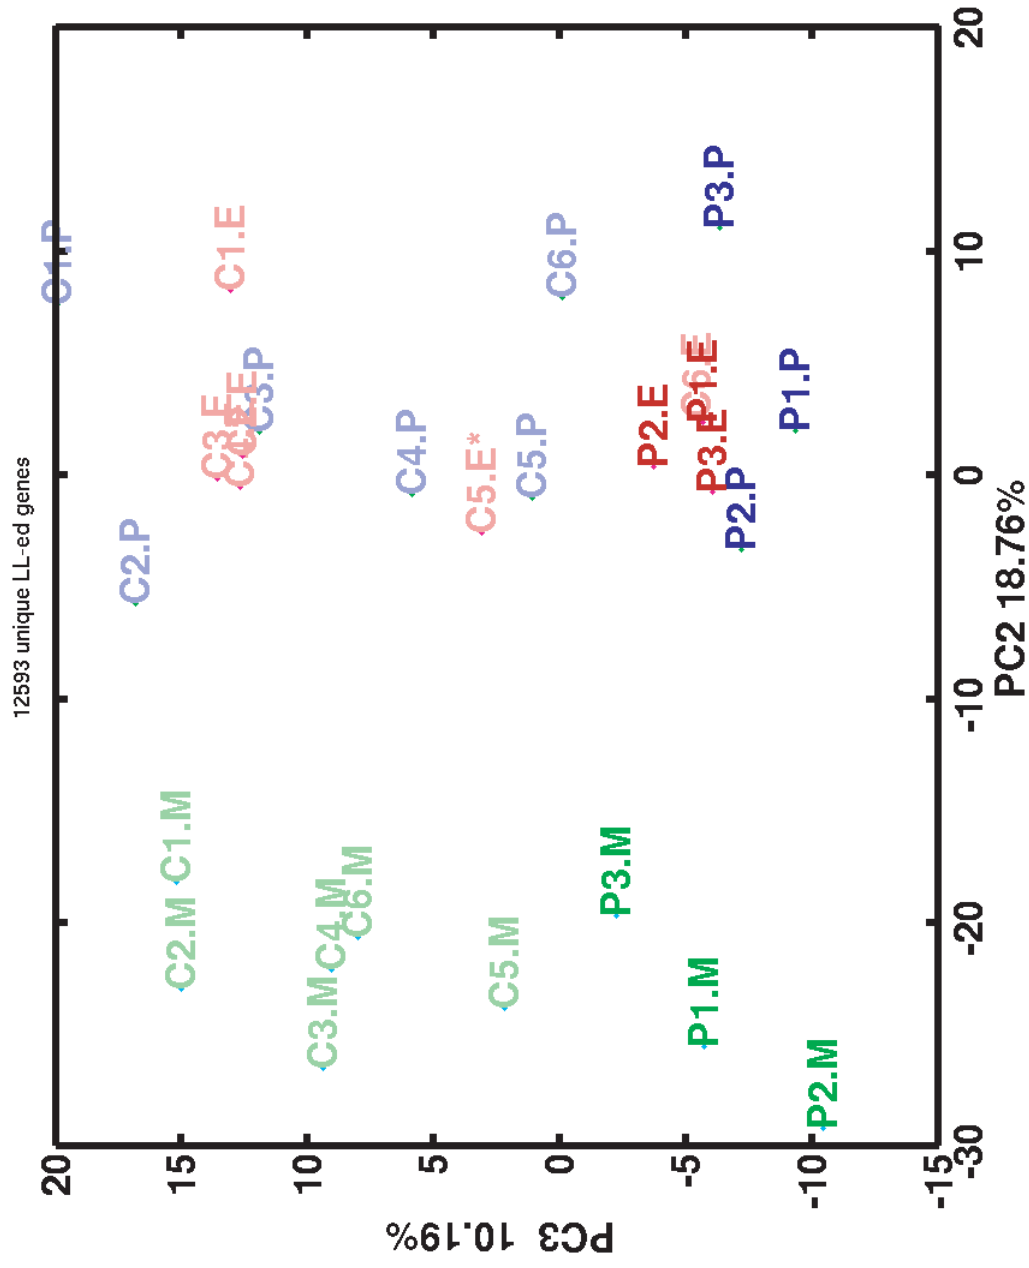

Fig.S2 (Supplemental Material)

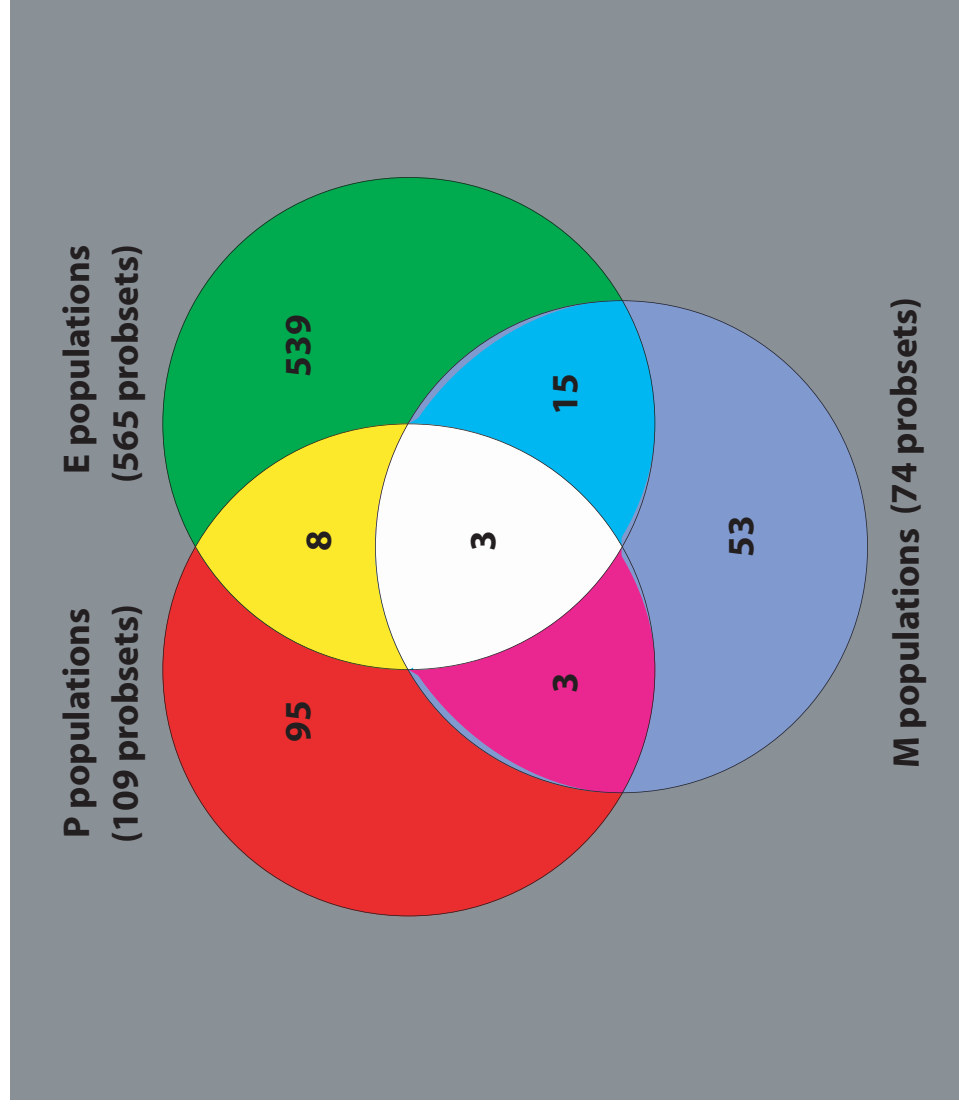



## Figure Legend (Supplemental Material)

Fig. S1. PC3 performed on 12,593 genes (with LocusLink ID) and 27 samples clearly distinguished the diseased and control three cell populations P, E, and M. Blue color indicates P population, light blue - control samples (C1-C6), dark blue – diseased samples (D1-D3) samples; red color shows E population, light red - control samples, dark red – diseased samples; green color shows M population, light green - control samples, dark green - diseased samples. B)

Fig. S2. The overlap between the significantly changed genes in the P, E an M diseased BM populations.
